# Supplementary material for: Integrative QTL mapping and selection signatures in Groningen White Headed cattle inferred from whole-genome sequences
Source: PLoS One. 2022 Oct 26;17(10):e0276309. doi: 10.1371/journal.pone.0276309 (PMC9605288; doi:10.1371/journal.pone.0276309)
Supplement: S4 Table — (XLSX) [file pone.0276309.s005.xlsx]

## Sheet: Suppl T4
S4 Table. Genome-wide significant QTL for phenotypic variation of GWH from contrasting Simmental, Hereford white headed breeds
BTA	N	SNP	START	STOP	P-value	q-value	Bonferroni	δ	SE	A1	MAF
1	5	1_18010558	18010558	19312327	3.87e-36	2.07e-30	3.73e-29	0.914792	0.0384601	C	0.154
1	3	1_152143813	152143813	153417834	6.91e-20	1.69e-14	6.67e-13	0.735448	0.0592328	C	0.141
1	6	1_143598005	143595560	147576846	1.78e-19	3.74e-14	1.72e-12	0.726209	0.0596213	T	0.141
1	11	1_603126	602936	9183467	1.57e-15	9.75e-11	1.51e-08	0.646618	0.0632472	C	0.147
1	8	1_75868332	74661542	79435754	6.61e-09	2.84e-05	0.0638011	0.232523	0.0359514	C	0.348
1	147	1_27318274	20524073	28012377	1.6e-08	5.74e-05	0.154742	0.438597	0.0700745	T	0.129
1	6	1_139428775	134878804	139428799	2.45e-08	8.12e-05	0.236885	0.440268	0.0714937	A	0.127
1	4	1_60851437	60293511	65615320	4.06e-08	0.000122734	0.392257	0.407375	0.067467	A	0.145
1	8	1_113623028	113623028	113626520	4.47e-08	0.000133213	0.431476	0.224864	0.0373814	A	0.296
1	2	1_95798765	95798765	97714531	2.21e-07	0.000462181	1	0.206883	0.0367481	G	0.329
2	10	2_77741520	71227473	78809343	1.21e-20	3.35e-15	1.17e-13	0.715536	0.0556649	A	0.155
2	2	2_18210715	13153344	18210715	3.18e-12	5.95e-08	3.07e-05	0.560735	0.0681164	A	0.136
2	8	2_85860862	80993678	89288136	8.46e-10	5.55e-06	0.00816524	0.274818	0.0395585	T	0.225
2	15	2_60277000	60250258	67451185	2.15e-09	1.17e-05	0.0207196	0.248754	0.0369582	C	0.286
2	6	2_110422369	110422369	119885485	7.62e-09	3.19e-05	0.0736019	0.44758	0.0695633	A	0.13
2	8	2_134069361	134045414	134803785	1.5e-08	5.46e-05	0.144632	0.254953	0.0406302	C	0.229
2	3	2_55902362	55304087	57862317	1.81e-08	6.33e-05	0.1744	0.383676	0.0615783	T	0.157
2	16	2_4705059	4682650	4728848	4.95e-08	0.00014433	0.47831	0.218605	0.0364903	G	0.338
2	6	2_127414648	121721026	129022840	5.07e-08	0.000146885	0.489106	0.214412	0.0358223	A	0.296
2	2	2_93959000	90107715	93959000	5.66e-08	0.000161369	0.546234	0.435621	0.0731027	C	0.132
2	10	2_26155297	26155297	26162097	1.09e-07	0.000266067	1	0.195838	0.033757	G	0.352
2	4	2_104953034	102753608	108441921	2.73e-07	0.000540919	1	0.243093	0.0435733	A	0.211
3	7	3_21033745	20945591	24718201	1.15e-18	2.01e-13	1.11e-11	0.736245	0.0628146	A	0.162
3	16	3_77554470	73754871	78916854	2.81e-10	2.27e-06	0.00271107	0.28012	0.0388939	A	0.236
3	2	3_69328	69328	69342	3.51e-09	1.74e-05	0.0338546	0.411979	0.062269	T	0.155
3	9	3_63552657	63552657	69180715	2.91e-08	9.36e-05	0.281154	0.403462	0.0659528	A	0.147
3	7	3_108946961	100265311	108947445	6.97e-08	0.000188056	0.673054	0.218233	0.0369325	G	0.296
3	10	3_115422748	110492105	118930484	1.63e-07	0.000364583	1	0.199536	0.0349785	A	0.286
3	7	3_35544595	33232936	35546497	2.99e-07	0.00057508	1	0.238359	0.0428956	G	0.197
4	13	4_105962545	105600134	106235277	6.08e-39	3.67e-33	5.87e-32	0.999999	0.0133648	C	0.152
4	30	4_63063213	60008284	69946519	2.43e-35	1.07e-29	2.35e-28	0.904295	0.0391367	G	0.154
4	186	4_76933727	70356799	77776140	4.36e-21	1.32e-15	4.21e-14	0.387342	0.0295334	A	0.324
4	6	4_31152838	31152838	33898719	1.26e-18	2.18e-13	1.22e-11	0.717911	0.0613742	C	0.143
4	83	4_18930270	15654335	19963980	2.03e-14	9.83e-10	1.96e-07	0.343903	0.0365979	G	0.239
4	2	4_80267217	80267217	80267224	1.47e-12	3.28e-08	1.42e-05	0.570984	0.0678974	A	0.134
4	42	4_113900609	111843023	119744708	5.96e-11	5.96e-07	0.000575548	0.518898	0.0686454	A	0.14
4	131	4_25306155	21201044	29343090	4.17e-10	3.15e-06	0.00402539	0.283257	0.0398344	T	0.218
4	59	4_50749342	50534290	57683248	3.12e-08	9.85e-05	0.300791	0.278276	0.0456087	T	0.179
4	7	4_48689811	48689811	49092230	1.77e-07	0.000388127	1	0.246083	0.0432913	A	0.197
5	11	5_37828073	34150552	37828073	2.17e-51	7e-45	2.1e-44	1	0.00935339	G	0.15
5	265	5_59415832	50799327	59532269	2.17e-51	7e-45	2.1e-44	1	0.00935339	A	0.15
5	24	5_80135782	80135782	89491462	1.77e-18	2.85e-13	1.71e-11	0.700551	0.0603142	A	0.143
5	6	5_105100154	101034598	105100154	1.45e-17	1.58e-12	1.4e-10	0.679882	0.0612237	G	0.145
5	488	5_17047656	10190499	17986750	3.15e-16	2.45e-11	3.04e-09	0.371199	0.035792	C	0.254
5	108	5_97874613	91414188	98330542	1.21e-15	7.76e-11	1.16e-08	0.354742	0.035281	A	0.246
5	18	5_6343115	3039484	8745741	4.75e-11	4.87e-07	0.000458709	0.290478	0.0381643	T	0.25
5	64	5_48104788	46910785	48446651	9.24e-11	8.43e-07	0.000892024	0.268635	0.0360181	T	0.324
5	3	5_23619312	23308256	28871958	1.43e-10	1.24e-06	0.00137803	0.283042	0.0384661	A	0.254
5	24	5_65872955	60830904	69015426	3.25e-10	2.55e-06	0.00313611	0.327402	0.045672	C	0.214
5	8	5_70207512	70003242	75181890	1.08e-08	4.22e-05	0.104618	0.23448	0.0369179	A	0.282
6	88	6_17588626	10570959	17588663	5.77e-20	1.47e-14	5.57e-13	0.753523	0.0604681	G	0.141
6	29	6_67267684	61157578	69865762	7.6e-18	9.54e-13	7.34e-11	0.363495	0.03228	C	0.275
6	2	6_29081124	29081124	29081128	1.21e-17	1.44e-12	1.17e-10	0.678361	0.0608474	C	0.145
6	23	6_35405296	31261489	37776996	3.68e-12	6.72e-08	3.55e-05	0.510801	0.062305	G	0.162
6	11	6_42404100	42404100	44500874	6.79e-12	9.99e-08	6.55e-05	0.548198	0.0680326	G	0.14
6	41	6_98239975	90100166	98252167	1.59e-11	1.93e-07	0.000153891	0.341567	0.0434451	T	0.211
6	16	6_7329970	6251288	8176600	3.09e-11	3.34e-07	0.000297884	0.808482	0.0497971	G	0.159
6	2	6_115767673	114732024	115767673	3.7e-10	2.83e-06	0.00356863	0.27679	0.0387732	G	0.264
6	18	6_70331510	70190653	75516833	2.32e-09	1.26e-05	0.0223974	0.243577	0.0362868	T	0.329
6	14	6_102895492	102858167	102895492	5.89e-09	2.6e-05	0.056858	0.247881	0.0381664	G	0.296
7	21	7_7132504	4268083	9717362	5.14e-36	2.61e-30	4.97e-29	0.910744	0.038462	C	0.154
7	4	7_71298709	71298408	71298723	2.04e-33	7.04e-28	1.97e-26	0.991005	0.0196497	T	0.154
7	19	7_15773485	10047388	15773485	9.98e-19	1.78e-13	9.64e-12	0.713909	0.0607325	A	0.143
7	9	7_44861427	40207423	48535423	1.38e-18	2.3e-13	1.33e-11	0.718218	0.0615153	G	0.143
7	34	7_61568757	61257584	62484722	2.59e-14	1.24e-09	2.5e-07	0.328931	0.0352181	C	0.261
7	20	7_85391791	83116675	85444581	2.71e-11	3e-07	0.000262139	0.305249	0.0394389	G	0.232
8	2	8_92337962	92337962	98866391	1.99e-42	3.2e-36	1.92e-35	0.941134	0.0316683	C	0.152
8	3	8_47674667	40830905	47675007	2.38e-18	3.77e-13	2.3e-11	0.680631	0.0589664	G	0.159
8	60	8_105841129	101442581	105841129	2.28e-17	2.44e-12	2.2e-10	0.659545	0.0599785	G	0.145
8	29	8_82128635	82104620	83017356	1.13e-11	1.47e-07	0.000109393	0.291474	0.0367079	A	0.275
8	2	8_110190491	110190491	111792650	2.6e-09	1.38e-05	0.0251135	0.439016	0.0656633	T	0.127
9	13	9_13677257	12401298	19948367	7.58e-17	7.17e-12	7.32e-10	0.661091	0.0617319	G	0.147
9	48	9_3193937	42274	3332187	2.42e-12	4.69e-08	2.34e-05	0.555691	0.0669982	A	0.15
9	2	9_80584040	80584040	84675608	5.49e-12	8.71e-08	5.3e-05	0.56237	0.0693712	A	0.136
9	40	9_50850818	50100384	54397792	4.03e-10	3.07e-06	0.00389326	0.281829	0.0395907	C	0.218
9	70	9_45897152	44645646	49401732	4.8e-10	3.53e-06	0.00463363	0.279451	0.0394799	A	0.218
9	6	9_29277566	20121917	29891793	1.14e-09	7.04e-06	0.0109675	0.436297	0.0634276	T	0.169
9	2	9_99246621	92706742	99246621	3.28e-09	1.65e-05	0.03171	0.461449	0.0695853	C	0.127
9	4	9_104352256	102997602	104352301	7.87e-09	3.27e-05	0.0760255	0.450354	0.0700774	A	0.129
9	2	9_36460435	36460435	36467800	2.35e-07	0.000483452	1	0.210929	0.0375621	T	0.289
10	41	10_25266641	22841602	29143323	1.41e-40	1.49e-34	1.36e-33	0.999999	0.0133648	A	0.152
10	63	10_34891295	33248167	38442114	4.96e-19	9.38e-14	4.79e-12	0.710728	0.0595897	A	0.141
10	3	10_53616542	53616542	57429237	2.43e-18	3.79e-13	2.35e-11	0.679763	0.0589198	G	0.143
10	9	10_8531769	23280	8531769	4.82e-18	6.56e-13	4.65e-11	0.669015	0.0588349	C	0.157
10	3	10_72781398	72781398	78889181	6.38e-18	8.21e-13	6.16e-11	0.674767	0.0596966	G	0.143
10	24	10_100605342	100556133	100650866	5.44e-12	8.71e-08	5.25e-05	0.331595	0.0408939	G	0.218
10	2	10_15103105	15103105	15345227	6.82e-09	2.91e-05	0.0658879	0.351086	0.0543465	G	0.169
11	4	11_47124103	47123881	47124137	1.28e-40	1.49e-34	1.23e-33	0.999999	0.0133648	C	0.152
11	66	11_98691289	90084795	99857226	2.21e-33	7.35e-28	2.13e-26	0.999999	0.0165416	G	0.154
11	15	11_61747204	61739603	69747252	4.97e-13	1.38e-08	4.8e-06	0.334777	0.038666	G	0.232
11	6	11_25617173	21905905	27706516	2.79e-12	5.34e-08	2.7e-05	0.54199	0.0656031	G	0.134
11	7	11_72998737	72998722	73511007	8.98e-12	1.2e-07	8.67e-05	0.531123	0.0664437	G	0.136
11	6	11_10316194	10316194	13768348	2.45e-09	1.31e-05	0.0236125	0.265652	0.0396482	A	0.243
11	7	11_104554624	100082897	104753070	6.28e-09	2.73e-05	0.0606161	0.228751	0.0353026	C	0.293
11	8	11_80949475	80945424	89846453	6.55e-09	2.82e-05	0.0632554	0.252349	0.0390046	C	0.236
11	6	11_31246895	31056963	37374572	3.17e-08	0.000100034	0.306304	0.241149	0.0395517	A	0.3
12	60	12_19946823	12647495	19954592	4.64e-14	2.07e-09	4.48e-07	0.31135	0.0338241	G	0.289
12	37	12_70670779	70108427	72656389	2.09e-11	2.45e-07	0.000202117	0.522012	0.0669291	G	0.14
12	58	12_68827093	68048002	69772760	2.46e-11	2.78e-07	0.000237827	0.27873	0.0359089	G	0.317
12	20	12_9563092	3240269	9593015	2.71e-10	2.19e-06	0.00261296	0.270671	0.0375375	A	0.225
12	14	12_80395535	80217866	80621316	5.03e-09	2.31e-05	0.0485987	0.28235	0.0432288	A	0.204
12	3	12_26521981	26521981	27193128	8.4e-09	3.45e-05	0.0811334	0.414765	0.0646934	C	0.174
13	92	13_62518056	60181814	62875952	5.44e-35	2.28e-29	5.25e-28	0.900266	0.0394616	C	0.154
13	28	13_3881018	483317	9762336	2.89e-17	2.91e-12	2.8e-10	0.682179	0.0623623	C	0.145
13	116	13_21153998	21122192	23981298	5.11e-13	1.41e-08	4.93e-06	0.336114	0.0388488	G	0.232
13	42	13_31127913	31124007	36004474	8.37e-09	3.45e-05	0.0808411	0.22957	0.0358026	G	0.338
13	7	13_44616129	44156728	44717280	7.09e-08	0.000190714	0.684283	0.236117	0.0399859	G	0.296
13	9	13_59688777	59145218	59812132	9.18e-08	0.000231191	0.886782	0.258182	0.0441887	A	0.183
14	2	14_18514013	10230626	18514013	7.51e-20	1.69e-14	7.25e-13	0.740902	0.0597719	A	0.141
14	6	14_33202752	33202748	39051782	7.51e-20	1.69e-14	7.25e-13	0.740902	0.0597719	G	0.141
14	5	14_4340950	3379193	7418361	4.42e-16	3.39e-11	4.27e-09	0.666609	0.0623646	T	0.145
14	5	14_76910995	76910992	76911033	4.83e-12	8e-08	4.66e-05	0.565381	0.0694906	C	0.136
14	2	14_47462750	42024940	47462750	1.34e-11	1.69e-07	0.000129824	0.544472	0.0689111	G	0.138
15	134	15_56700111	50676600	59891522	7.25e-54	7e-47	7e-47	0.971771	0.0221563	G	0.15
15	18	15_49989757	41073981	49992865	6.24e-44	1.2e-37	6.02e-37	0.952184	0.0304129	C	0.152
15	13	15_14681719	13010557	15947285	7.51e-20	1.69e-14	7.25e-13	0.740902	0.0597719	G	0.141
15	13	15_757788	153047	9001053	1.56e-12	3.45e-08	1.5e-05	0.562051	0.0669436	T	0.134
15	62	15_65360039	60848781	66322081	3.31e-10	2.6e-06	0.00319152	0.265777	0.0370964	A	0.31
15	18	15_84087298	80023764	84936436	2.94e-09	1.51e-05	0.0283592	0.468471	0.0703675	T	0.129
15	95	15_37860557	30023427	37884652	3.8e-08	0.000116163	0.367307	0.232423	0.0383928	T	0.218
15	4	15_23719597	23719597	27304846	2.18e-07	0.000455491	1	0.210904	0.0374349	T	0.304
16	22	16_65590029	65590029	69286342	1.54e-40	1.49e-34	1.48e-33	0.999999	0.0133648	T	0.152
16	10	16_4692386	205035	5195701	5.57e-39	3.67e-33	5.38e-32	0.992447	0.0164353	G	0.152
16	31	16_74224911	74090211	79927733	3.62e-12	6.63e-08	3.49e-05	0.290307	0.0353934	A	0.282
16	8	16_28269244	23935223	28668495	1.34e-08	4.99e-05	0.129607	0.43401	0.0688809	T	0.123
16	3	16_54644996	51027582	59783912	3.01e-08	9.6e-05	0.290542	0.404496	0.0662063	T	0.12
16	4	16_16131108	16112130	19894317	9.44e-08	0.000236682	0.911724	0.213124	0.0365187	A	0.343
17	7	17_25777809	25428374	28244855	5.75e-39	3.67e-33	5.55e-32	0.496858	0.00805936	T	0.304
17	32	17_54301609	51401455	59286267	1.03e-14	5.52e-10	9.93e-08	0.334916	0.0350543	G	0.257
17	13	17_5075389	4433211	5085376	2.94e-10	2.36e-06	0.00283747	0.253399	0.0352352	A	0.348
17	9	17_60796446	60166843	64607349	1.31e-09	7.93e-06	0.0126183	0.278178	0.040633	G	0.204
17	8	17_12116917	12116917	16617323	9.56e-09	3.82e-05	0.0923304	0.224082	0.0351181	G	0.362
17	14	17_39629083	32046152	39670197	1.97e-07	0.000421483	1	0.293207	0.0518192	C	0.162
18	7	18_54747505	51062987	57290388	1.21e-34	4.66e-29	1.16e-27	0.909138	0.0403572	T	0.154
18	39	18_27959010	21683779	27992133	7.42e-12	1.08e-07	7.17e-05	0.286569	0.0356545	G	0.289
18	40	18_17826418	14643255	18496863	4.63e-11	4.78e-07	0.00044725	0.286222	0.0375764	A	0.254
18	25	18_1824645	277527	7456700	4.69e-10	3.48e-06	0.00452398	0.276535	0.0390373	T	0.221
18	12	18_40781760	40638554	49357013	4.16e-09	1.99e-05	0.0401895	0.33985	0.0516802	A	0.171
18	12	18_32115099	31984506	32136030	7.64e-08	0.000202903	0.738163	0.218797	0.0371672	A	0.3
18	6	18_60575491	60558209	60620062	1.23e-07	0.000292068	1	0.248804	0.0430969	C	0.246
19	13	19_61880475	61130018	63062492	1.32e-13	4.36e-09	1.28e-06	0.312691	0.0348874	A	0.275
19	3	19_42686800	42686715	46910429	1.36e-12	3.27e-08	1.31e-05	0.552013	0.0655073	C	0.134
19	11	19_8979310	8979296	8990451	3.44e-12	6.34e-08	3.32e-05	0.54196	0.0659794	G	0.136
20	307	20_22101449	20253630	29593395	1.17e-20	3.33e-15	1.13e-13	0.719028	0.0558963	T	0.155
20	16	20_38480712	37732174	38480712	7.51e-20	1.69e-14	7.25e-13	0.740902	0.0597719	C	0.141
20	1226	20_15201740	10237467	19916088	4.71e-19	9.38e-14	4.55e-12	0.369171	0.0309203	G	0.282
20	31	20_62181433	62181433	68682156	9.41e-12	1.26e-07	9.09e-05	0.514161	0.064408	T	0.15
20	51	20_9930494	166462	9991283	1.56e-11	1.9e-07	0.000150803	0.275721	0.0350491	T	0.254
20	3	20_53379659	53379659	59077496	3.51e-11	3.73e-07	0.00033874	0.51582	0.0671561	T	0.138
20	26	20_43728834	43721079	49680159	8.69e-09	3.54e-05	0.0839441	0.219237	0.0342385	A	0.307
21	57	21_69787305	65606152	69787305	7.7e-38	4.37e-32	7.43e-31	0.915477	0.0362068	A	0.154
21	23	21_8631358	692912	9866237	3.27e-12	6.12e-08	3.16e-05	0.302471	0.036774	C	0.296
21	16	21_20320499	20320499	29981901	1.3e-10	1.15e-06	0.00125292	0.28545	0.0386782	A	0.268
21	26	21_12434813	11175640	17973769	8.29e-10	5.45e-06	0.00800057	0.241986	0.0348088	A	0.373
21	22	21_34580844	34580137	38959205	3.01e-09	1.54e-05	0.0290656	0.232359	0.034932	C	0.338
21	2	21_44339377	40873989	44339377	5.38e-09	2.43e-05	0.051931	0.238235	0.0365616	G	0.321
21	3	21_59672846	53871677	59672846	1.53e-07	0.000347794	1	0.379141	0.0662943	G	0.148
22	17	22_50033321	50033321	58823054	1.37e-18	2.3e-13	1.33e-11	0.701942	0.0601156	G	0.143
22	28	22_31190097	30738825	33975528	2e-15	1.22e-10	1.93e-08	0.349804	0.0352061	G	0.268
22	31	22_22381501	22381439	28407284	4.78e-12	8e-08	4.61e-05	0.519975	0.0638914	G	0.152
22	3	22_18450161	18450161	18478806	4.33e-08	0.00012982	0.418539	0.402542	0.0668379	A	0.12
23	8	23_31665063	31405782	35924154	5.58e-18	7.28e-13	5.39e-11	0.689155	0.0607956	T	0.143
23	3	23_21397	21397	8914079	6.69e-12	9.91e-08	6.46e-05	0.522512	0.0648183	T	0.162
23	4	23_29912900	28535951	29912900	3.71e-09	1.82e-05	0.0357812	0.465402	0.0704814	T	0.141
23	2	23_49678541	45521610	49678541	6.86e-09	2.92e-05	0.0662255	0.248438	0.0384642	T	0.218
24	21	24_13747552	12558709	16038988	6.61e-50	1.6e-43	6.38e-43	1	0.00935339	T	0.15
24	34	24_39720428	30486341	39720428	2.25e-13	7.14e-09	2.18e-06	0.871527	0.041911	G	0.155
24	20	24_58881825	55403059	58895033	9.75e-08	0.000242789	0.941779	0.248347	0.0426112	G	0.225
24	2	24_45189656	45189656	45189706	6.09e-07	0.000929734	1	0.28413	0.0527957	A	0.162
25	43	25_5696641	40553	9762889	5.94e-15	3.3e-10	5.74e-08	0.31038	0.032058	C	0.324
25	32	25_34573588	34524948	39108683	1.77e-14	9.04e-10	1.71e-07	0.585642	0.0621161	A	0.162
25	12	25_15151806	10177456	17397058	1.45e-10	1.25e-06	0.00140262	0.306795	0.0417174	T	0.221
25	25	25_26853571	24665919	26951592	8.82e-08	0.000226213	0.851466	0.310784	0.0531028	A	0.162
26	15	26_33455990	33392965	38914531	4.94e-33	1.59e-27	4.77e-26	0.981965	0.0222203	C	0.154
26	5	26_323816	323750	323825	4.44e-18	6.12e-13	4.29e-11	0.691675	0.0607214	A	0.143
26	40	26_49863754	40183698	49863754	4.22e-11	4.41e-07	0.000407826	0.504228	0.0660133	C	0.138
26	10	26_22845695	22347400	26119186	1.58e-09	9.21e-06	0.015259	0.357025	0.0524888	G	0.169
26	4	26_17105173	17105173	17128623	7.52e-08	0.000200117	0.725826	0.237046	0.0402396	T	0.254
27	28	27_373694	80538	6395696	1.54e-16	1.28e-11	1.48e-09	0.664769	0.0630654	A	0.147
27	2	27_37450809	37450809	37450814	2.05e-07	0.000436552	1	0.387734	0.0686458	G	0.12
28	141	28_35348138	30294985	35364861	3.05e-09	1.56e-05	0.0294228	0.271199	0.0407885	C	0.211
28	2	28_1253217	521855	1253217	4.21e-09	2.01e-05	0.0406665	0.45296	0.0689097	A	0.13
28	3	28_23754701	23754701	23762819	4.88e-07	0.000794334	1	0.270211	0.0497067	A	0.171
29	50	29_30184810	30184810	39296132	1.54e-40	1.49e-34	1.49e-33	0.999999	0.0133648	A	0.152
29	5	29_5452379	439866	5456348	4e-22	1.24e-16	3.86e-15	0.784203	0.0571006	A	0.155
29	7	29_27532244	26521673	27532353	2.18e-12	4.6e-08	2.11e-05	0.556879	0.0669478	C	0.138
29	3	29_49849755	45936193	49849755	2.3e-09	1.25e-05	0.0222292	0.456418	0.067977	A	0.129
1BTA: Bos taurus chromosomes, Position (pb): , N: Number of SNPs significantly associated, SNP: SNP displaying the most significant association with the GWH phenotype, START: beginning of genomic region (pb)containing SNPs significantly associated ,STOP: final position of the genomic region (pb) containing SNPs significantly associated , P-value: nominal P-value, q-value: q-value calculated with …
